# Supplementary material
Source: PubMed Central journal article supplement (PMC9716513)
Supplement: 41579_2022_822_MOESM1_ESM.pdf [file 41579_2022_822_MOESM1_ESM.pdf]

---

# SARS-CoV-2 viral load and shedding kinetics

---

In the format provided by the authors and unedited

---

## Supplementary tables.

Abbreviations:

IV – infectious virus

VL – viral load

**Figure 2. Kinetics of RNA and infectious VLs for ancestral SARS-CoV-2**

| Study                           | Parameter measured                   | How the study was conducted                                                                                                                                                                      | Findings                                                                                                                                                                                             |
|---------------------------------|--------------------------------------|--------------------------------------------------------------------------------------------------------------------------------------------------------------------------------------------------|------------------------------------------------------------------------------------------------------------------------------------------------------------------------------------------------------|
| Li et al., 2020 <sup>1</sup>    | Onset of symptoms, incubation period | Information on demographic characteristics, exposure history, and illness timelines on first 425 laboratory-confirmed Covid-19 cases linked to the Huanan Seafood Wholesale Market was collected | Mean incubation period was 5.2 days (95% confidence interval [CI], 4.1 to 7.0)                                                                                                                       |
| Cheng et al., 2021 <sup>2</sup> | Onset of symptoms, incubation period | Authors included 53 studies published from December 1, 2019 to May 26, 2021 and used random-effect model to pool the mean incubation period                                                      | Mean incubation period was 6.0 days (95% confidence interval [CI] 5.6–6.5) globally, 6.5 days (95% CI 6.1–6.9) in the mainland of China, and 4.6 days (95% CI 4.1–5.1) outside the mainland of China |
| Elias et al., 2021 <sup>3</sup> | Onset of symptoms, incubation period | 99 studies published from 1 January 2020 to 10 January 2021 reporting SARS-CoV-2 incubation period were systematically reviewed. The pooled estimate was generated using                         | Mean incubation period across the studies was 6.38 days, 95% CI (5.79; 6.97).                                                                                                                        |

|                                     |                                      |                                                                                                                                                                                   |                                                                                                                                                                        |
|-------------------------------------|--------------------------------------|-----------------------------------------------------------------------------------------------------------------------------------------------------------------------------------|------------------------------------------------------------------------------------------------------------------------------------------------------------------------|
|                                     |                                      | individual mean and SD                                                                                                                                                            |                                                                                                                                                                        |
| Alene et al., 2021 <sup>4</sup>     | Onset of symptoms, incubation period | Data on 1, 453 COVID-19 patients from 14 different studies were used to estimate mean incubation period                                                                           | Mean incubation period of was 6.5 (95%CI: 5.9–7.1) days                                                                                                                |
| Xin et al., 2021 <sup>5</sup>       |                                      | 72 studies published between 11 January 2020 and 13 April 2020 were reviewed and analysed                                                                                         | Mean incubation period 6.3 days (range, 1.8-11.9 days), median incubation period 5.4 days (range, 2.0-17.9 days)                                                       |
| Néant et al., 2021 <sup>6</sup>     | RNA VLs                              | RNA VLs were assessed as Ct values from nasopharyngeal swabs collected from 655 hospitalized patients and dynamics of viral loads were visualized using target cell-limited model | RNA VLs were detected for 13 dpos in younger patients and 16 dpos in older patients ( $\geq 65$ years old). Peak RNA VLs were predicted to coincide with symptom onset |
| Wölfel et al., 2020 <sup>7</sup>    | Infectious VLs                       | Virological kinetics was analysed in specimens collected from 9 hospitalised patients                                                                                             | IV was isolated up to 9 dpos in URT specimens                                                                                                                          |
| Bullard et al., 2020 <sup>8</sup>   | Kinetics of infectious and RNA VLs   | Ct values for SARS-CoV-2 and IV isolation probability were determined from 90 patients at 0 up to 21 dpos.                                                                        | No IV was recovered after 8 dpos. RNA VLs were detected for more than 10 dpos                                                                                          |
| Jefferson et al., 2020 <sup>9</sup> | Kinetics of infectious VLs           | 29 studies which attempted to culture IV from SARS-CoV-2 positive specimens were included                                                                                         | Despite the detection of RNA VLs for $> 14$ dpos, the possibility to isolate IV declined after 8 dpos                                                                  |
| Cevik et al., 2021 <sup>10</sup>    | Kinetics of RNA VLs                  | 43 studies (including 3229 individuals) were included for systemic review and meta-analysis reported duration of                                                                  | Mean duration of viral RNA detection was 17 days (95% CI 15.5–18.6); highest VLs were reported shortly                                                                 |

|                                    |                                |                                                                                                                                                                                |                                                                                                                                                   |
|------------------------------------|--------------------------------|--------------------------------------------------------------------------------------------------------------------------------------------------------------------------------|---------------------------------------------------------------------------------------------------------------------------------------------------|
|                                    |                                | shedding in the upper respiratory tract.<br>8 studies isolated IV from URT specimens                                                                                           | after or at the time of the symptom onset; no IV was isolated beyond 8 or 9 dpos                                                                  |
| Brümmer et al., 2021 <sup>11</sup> | SARS-CoV-2 detection by Ag-RDT | 214 clinical studies with 112,323 samples, which evaluated the accuracy of SARS-CoV-2 diagnostics by Ag-RDT and published before 30 April 2021 were included for meta-analysis | Substantially higher sensitivity at the first week post onset of symptoms compared to lower sensitivity when tested at the 2nd week post symptoms |

**Figure 3. Infectious VLs and symptom onset in SARS-CoV-2 Delta and Omicron BA.1 variants of concern**

Parameters displayed for ancestral SARS-CoV-2 are described for the Figure 2.

| <b>Study</b>                     | <b>Parameter measured</b>      | <b>How the study was conducted</b>                                                                                                                                                                                                             | <b>Findings</b>                                                                                                        |
|----------------------------------|--------------------------------|------------------------------------------------------------------------------------------------------------------------------------------------------------------------------------------------------------------------------------------------|------------------------------------------------------------------------------------------------------------------------|
| Grant et al., 2022 <sup>12</sup> | Incubation period of Delta VOC | The nationwide case control study used SARS-CoV-2 infection diagnoses (8644 Delta and 3990 non-Delta), where the participants filled up the questionnaire about the SARS-CoV-2 exposure and testing information to determine incubation period | Mean incubation period was shorter in Delta-infected cases (4.3 days) in comparison to non-Delta infections (5.0 days) |
| Ogata et al., 2022 <sup>13</sup> | Incubation period of Delta VOC | 214 patients (121 Delta and 103 non-Delta cases) with one specific date of exposure to SARS-CoV-2 were enrolled and the data on symptoms and history to define the time of exposure were collected by healthcare professionals                 | The mean incubation period was 3.7 days for Delta and 4.9 days for non-Delta cases                                     |

|                                      |                                                                     |                                                                                                                                                                                       |                                                                                                                                                                                                   |
|--------------------------------------|---------------------------------------------------------------------|---------------------------------------------------------------------------------------------------------------------------------------------------------------------------------------|---------------------------------------------------------------------------------------------------------------------------------------------------------------------------------------------------|
| Backer et al., 2022 <sup>14</sup>    | Incubation period of BA.1 VOC                                       | 258 Omicron (S gene target failure) cases and 255 non-Omicron cases with reported symptom onset date between 1 December 2021 and 2 January 2022 in the national surveillance database | mean incubation period is estimated to be 3.2 days (SD: 2.2 days) for Omicron cases and 4.4 days (SD: 2.5 days) for non-Omicron cases                                                             |
| Jansen et al., 2021 <sup>15</sup>    | Incubation period of BA.1 VOC                                       | A cluster of 18 patients infected with Omicron VOC was used for detailed epidemiological investigation                                                                                | The median incubation period for Omicron was 3 days                                                                                                                                               |
| Puhach et al., 2022 <sup>16</sup>    | Peak infectious VLs of ancestral SARS-CoV-2, Delta and Omicron VOCs | Infectious VLs of collected at first 5 dpos from patients infected ancestral (n=118), Delta (n=293) Omicron BA.1 (n=154) were determined by focus-forming assay (FFA)                 | Higher infectious VLs in Delta-infected patients in comparison to ancestral SARS-CoV-2; lower VLs in Omicron-infected patients                                                                    |
| Takahashi et al., 2022 <sup>17</sup> | Infectious VLs of Omicron VOC                                       | IV was isolated from serially collected samples from 10 vaccinated patients infected with Omicron BA.1 VOC                                                                            | IV was isolated up to 9 days post diagnosis, with highest probability of virus isolation in samples collected at 2-5 days after days post diagnosis and no IV was isolated 10 days post diagnosis |
| Siedner et al., 2022 <sup>18</sup>   | Infectious VLs of Omicron BA.1 VOC                                  | IV was isolated from serially collected samples from 10 vaccinated Delta-infected patients                                                                                            | In 9 of 10 (90%) individuals culturable virus was detected up to 10 dpos                                                                                                                          |
| Boucau et al., 2022 <sup>19</sup>    | Infectious VLs of Omicron VOC                                       | 32 Delta- and 34 Omicron infected patients                                                                                                                                            | Culturable virus was detected up to 10 days and up to 9 days since initial detection in Delta- and Omicron infected individuals respectively                                                      |

**Figure 4. Influence of vaccination on VLs (Delta VOC used as an example)**

| Study                                   | Parameter measured     | How the study was conducted                                                                                                                                                                                                     | Findings                                                                                                                           |
|-----------------------------------------|------------------------|---------------------------------------------------------------------------------------------------------------------------------------------------------------------------------------------------------------------------------|------------------------------------------------------------------------------------------------------------------------------------|
| Singanayagam et al., 2021 <sup>20</sup> | Infectious and RNA VLs | VLs were compared between fully vaccinated individuals (n=29) and unvaccinated subjects (n=16) infected with Delta VOC. Most of the patients received either BNT162b2 mRNA vaccine or ChAdOx1 nCoV-19 adenovirus vector vaccine | Same peak RNA VLs in vaccinated and unvaccinated Delta-infected patients, but faster clearance of RNA VLs                          |
| Puhach et al., 2022 <sup>16</sup>       | Infectious and RNA VLs | Infectious (measured by FFA) and RNA VLs were compared between fully vaccinated (n=104) and unvaccinated (n=127) patients infected with Delta VOC. Most of the vaccinated patients received mRNA vaccines (95.2 %).             | Similar RNA VLs at 5 dpos, but higher infectious VLs in unvaccinated in comparison to unvaccinated individuals                     |
| Chia et al., 2021 <sup>21</sup>         | RNA VLs                | RNA VL kinetics was compared between vaccinated (n=88) and unvaccinated (n=130) patients. Most of the patients received 2 doses of mRNA vaccines (95.5 %).                                                                      | RNA VLs were similar between vaccinated and unvaccinated patients at first 5 dpos, but VLs decreased faster in vaccinated patients |

|                                           |                |                                                                                                                                                                                                    |                                                                                                                                           |
|-------------------------------------------|----------------|----------------------------------------------------------------------------------------------------------------------------------------------------------------------------------------------------|-------------------------------------------------------------------------------------------------------------------------------------------|
| Peña-Hernández et al., 2022 <sup>22</sup> | Infectious VLs | IV presence was determined by isolation from samples collected from 72 vaccinated and 53 unvaccinated individuals infected in the time period in which Delta was the predominantly circulating VOC | The proportion of samples with culturable virus was lower in vaccinated in comparison to unvaccinated patients (21% vs. 40% respectively) |
|-------------------------------------------|----------------|----------------------------------------------------------------------------------------------------------------------------------------------------------------------------------------------------|-------------------------------------------------------------------------------------------------------------------------------------------|

## References

1. Li, Q., *et al.* Early Transmission Dynamics in Wuhan, China, of Novel Coronavirus-Infected Pneumonia. *N Engl J Med* **382**, 1199-1207 (2020).
2. Cheng, C., *et al.* The incubation period of COVID-19: a global meta-analysis of 53 studies and a Chinese observation study of 11 545 patients. *Infect Dis Poverty* **10**, 119 (2021).
3. Elias, C., Sekri, A., Leblanc, P., Cucherat, M. & Vanhems, P. The incubation period of COVID-19: A meta-analysis. *Int J Infect Dis* **104**, 708-710 (2021).
4. Alene, M., *et al.* Serial interval and incubation period of COVID-19: a systematic review and meta-analysis. *BMC Infect Dis* **21**, 257 (2021).
5. Xin, H., *et al.* The Incubation Period Distribution of Coronavirus Disease 2019: A Systematic Review and Meta-analysis. *Clin Infect Dis* **73**, 2344-2352 (2021).
6. Néant, N., *et al.* Modeling SARS-CoV-2 viral kinetics and association with mortality in hospitalized patients from the French COVID cohort. *Proceedings of the National Academy of Sciences* **118**, e2017962118 (2021).
7. Wölfel, R., *et al.* Virological assessment of hospitalized patients with COVID-2019. *Nature* **581**, 465-469 (2020).
8. Bullard, J., *et al.* Predicting Infectious Severe Acute Respiratory Syndrome Coronavirus 2 From Diagnostic Samples. *Clin Infect Dis* **71**, 2663-2666 (2020).
9. Jefferson, T., Spencer, E.A., Brassey, J. & Heneghan, C. Viral Cultures for Coronavirus Disease 2019 Infectivity Assessment: A Systematic Review. *Clin Infect Dis* **73**, e3884-e3899 (2021).
10. Cevik, M., *et al.* SARS-CoV-2, SARS-CoV, and MERS-CoV viral load dynamics, duration of viral shedding, and infectiousness: a systematic review and meta-analysis. *Lancet Microbe* **2**, e13-e22 (2021).
11. Brümmer, L.E., *et al.* Accuracy of novel antigen rapid diagnostics for SARS-CoV-2: A living systematic review and meta-analysis. *PLoS Med* **18**, e1003735 (2021).
12. Grant, R., *et al.* Impact of SARS-CoV-2 Delta variant on incubation, transmission settings and vaccine effectiveness: Results from a nationwide case-control study in France. *Lancet Reg Health Eur* **13**, 100278 (2022).
13. Ogata, T., Tanaka, H., Irie, F., Hirayama, A. & Takahashi, Y. Shorter Incubation Period among Unvaccinated Delta Variant Coronavirus Disease 2019 Patients in Japan. *Int J Environ Res Public Health* **19**(2022).
14. Backer, J.A., *et al.* Shorter serial intervals in SARS-CoV-2 cases with Omicron BA.1 variant compared with Delta variant, the Netherlands, 13 to 26 December 2021. *Euro Surveill* **27**(2022).
15. Jansen, L., *et al.* Investigation of a SARS-CoV-2 B.1.1.529 (Omicron) Variant Cluster - Nebraska, November-December 2021. *MMWR Morb Mortal Wkly Rep* **70**, 1782-1784 (2021).
16. Puhach, O., *et al.* Infectious viral load in unvaccinated and vaccinated individuals infected with ancestral, Delta or Omicron SARS-CoV-2. *Nat Med* (2022).
17. Takahashi, K., *et al.* Duration of Infectious Virus Shedding by SARS-CoV-2 Omicron Variant-Infected Vaccinees. *Emerg Infect Dis* **28**, 998-1001 (2022).
18. Siedner, M.J., *et al.* Duration of viral shedding and culture positivity with postvaccination SARS-CoV-2 delta variant infections. *JCI Insight* **7**(2022).
19. Boucau, J., *et al.* Duration of Shedding of Culturable Virus in SARS-CoV-2 Omicron (BA.1) Infection. *N Engl J Med* **387**, 275-277 (2022).
20. Singanayagam, A., *et al.* Community transmission and viral load kinetics of the SARS-CoV-2 delta (B.1.617.2) variant in vaccinated and unvaccinated individuals in the UK: a prospective, longitudinal, cohort study. *Lancet Infect Dis* (2021).
21. Chia, P.Y., *et al.* Virological and serological kinetics of SARS-CoV-2 Delta variant vaccine breakthrough infections: a multicentre cohort study. *Clin Microbiol Infect* (2021).
22. Peña-Hernández, M.A., *et al.* Comparison of infectious SARS-CoV-2 from the nasopharynx of vaccinated and unvaccinated individuals. *medRxiv*, 2021.2012.2028.21268460 (2022).
